# Supplementary material for: Ti-decorated C30 as a high-capacity hydrogen storage material: insights from density functional theory
Source: Royal Society of Chemistry journal article supplement (doi:10.1039/d3se00845b), 2023-01-01
Supplement: d3se00845b1.pdf [file d3se00845b1.pdf]

### Supplementary Information

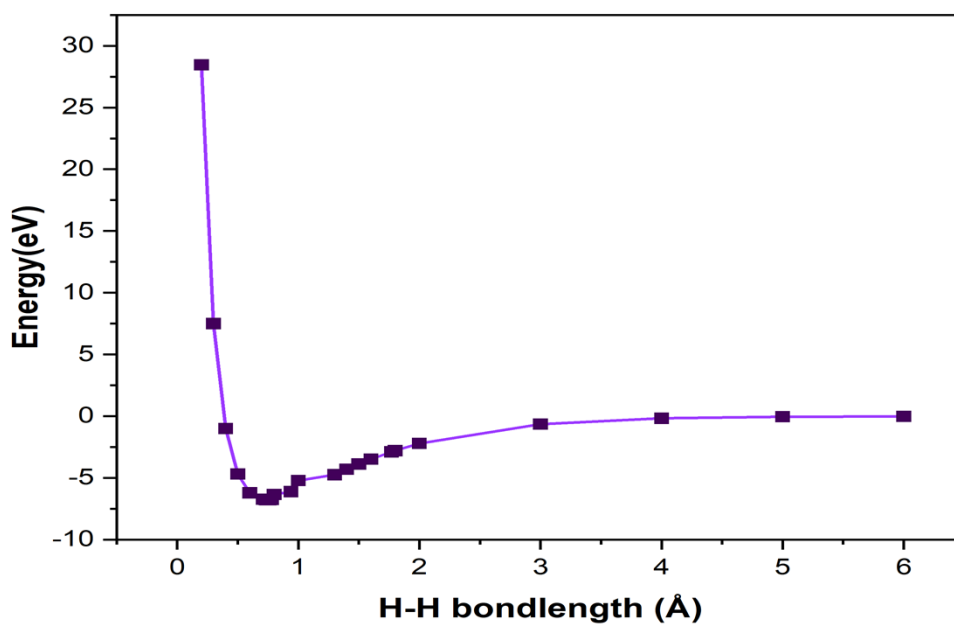

Figure S1: The dissociation curve for isolated H<sub>2</sub> molecule. The optimum bond-length came to be 0.75 Å with an energy of -6.67eV.
